# Supplementary material
Source: PubMed Central journal article supplement (PMC6730670)
Supplement: NIHMS1526666-supplement-2.pdf [file NIHMS1526666-supplement-2.pdf]

## Reporting Summary

Nature Research wishes to improve the reproducibility of the work that we publish. This form provides structure for consistency and transparency in reporting. For further information on Nature Research policies, see [Authors & Referees](#) and the [Editorial Policy Checklist](#).

### Statistical parameters

When statistical analyses are reported, confirm that the following items are present in the relevant location (e.g. figure legend, table legend, main text, or Methods section).

n/a | Confirmed

- The exact sample size ( $n$ ) for each experimental group/condition, given as a discrete number and unit of measurement
- An indication of whether measurements were taken from distinct samples or whether the same sample was measured repeatedly
- The statistical test(s) used AND whether they are one- or two-sided  
*Only common tests should be described solely by name; describe more complex techniques in the Methods section.*
- A description of all covariates tested
- A description of any assumptions or corrections, such as tests of normality and adjustment for multiple comparisons
- A full description of the statistics including central tendency (e.g. means) or other basic estimates (e.g. regression coefficient) AND variation (e.g. standard deviation) or associated estimates of uncertainty (e.g. confidence intervals)
- For null hypothesis testing, the test statistic (e.g.  $F$ ,  $t$ ,  $r$ ) with confidence intervals, effect sizes, degrees of freedom and  $P$  value noted  
*Give  $P$  values as exact values whenever suitable.*
- For Bayesian analysis, information on the choice of priors and Markov chain Monte Carlo settings
- For hierarchical and complex designs, identification of the appropriate level for tests and full reporting of outcomes
- Estimates of effect sizes (e.g. Cohen's  $d$ , Pearson's  $r$ ), indicating how they were calculated
- Clearly defined error bars  
*State explicitly what error bars represent (e.g. SD, SE, CI)*

Our web collection on [statistics for biologists](#) may be useful.

### Software and code

Policy information about [availability of computer code](#)

Data collection cellSens Dimension version 1.18 (Olympus), Zen 2.6 Blue edition (Carl Zeiss Microscopy)

Data analysis Statistical analyses were performed using GraphPad Prism (Graphpad Software v. 6 .0 and 8.0)

For manuscripts utilizing custom algorithms or software that are central to the research but not yet described in published literature, software must be made available to editors/reviewers upon request. We strongly encourage code deposition in a community repository (e.g. GitHub). See the Nature Research [guidelines for submitting code & software](#) for further information.

### Data

Policy information about [availability of data](#)

All manuscripts must include a [data availability statement](#). This statement should provide the following information, where applicable:

- Accession codes, unique identifiers, or web links for publicly available datasets
- A list of figures that have associated raw data
- A description of any restrictions on data availability

All data generated or analysed during this study are included in this article and its Supplementary Information files, or are available from the authors upon reasonable request.

## Field-specific reporting

Please select the best fit for your research. If you are not sure, read the appropriate sections before making your selection.

Life sciences  Behavioural & social sciences  Ecological, evolutionary & environmental sciences

For a reference copy of the document with all sections, see [nature.com/authors/policies/ReportingSummary-flat.pdf](https://www.nature.com/authors/policies/ReportingSummary-flat.pdf)

## Life sciences study design

All studies must disclose on these points even when the disclosure is negative.

|                 |                                                                                                                                                                                                                                                                                                                                                                                                       |
|-----------------|-------------------------------------------------------------------------------------------------------------------------------------------------------------------------------------------------------------------------------------------------------------------------------------------------------------------------------------------------------------------------------------------------------|
| Sample size     | No statistical method was performed to predetermine sample size. Sample sizes were determined based on reproducibility between biological replicates and individual experiments and on magnitude and consistency of measurable differences between groups.                                                                                                                                            |
| Data exclusions | No data were intentionally excluded from the analyses. Pr-established criteria for determining outliers were based on technical reasons and verified with the Grubb's outlier test for exclusion from analysis.                                                                                                                                                                                       |
| Replication     | All data are the result of independently-repeated experiments with independent biological sample. Experiments were repeated independently a minimum of three times with similar results in repeated experiments. All attempts at replication were successful assuming the technical reliability was acceptable within the experiment. Data reported in the manuscript are from biological replicates. |
| Randomization   | Randomization of samples was not relevant to the studies performed. Samples were allocated based on indicated treatment groups for analyses such as western blotting or luciferase activity.                                                                                                                                                                                                          |
| Blinding        | Blinding was not possible during most of data collection as investigations required information on the nature of groups or treatments. Blinding was used during scoring of competitive Bimolecular Fluorescence Complementation (BiFC) assays as stated in the Methods.                                                                                                                               |

## Reporting for specific materials, systems and methods

### Materials & experimental systems

| n/a                                 | Involved in the study                                           |
|-------------------------------------|-----------------------------------------------------------------|
| <input type="checkbox"/>            | <input checked="" type="checkbox"/> Unique biological materials |
| <input type="checkbox"/>            | <input checked="" type="checkbox"/> Antibodies                  |
| <input type="checkbox"/>            | <input checked="" type="checkbox"/> Eukaryotic cell lines       |
| <input checked="" type="checkbox"/> | <input type="checkbox"/> Palaeontology                          |
| <input type="checkbox"/>            | <input checked="" type="checkbox"/> Animals and other organisms |
| <input checked="" type="checkbox"/> | <input type="checkbox"/> Human research participants            |

### Methods

| n/a                                 | Involved in the study                           |
|-------------------------------------|-------------------------------------------------|
| <input checked="" type="checkbox"/> | <input type="checkbox"/> ChIP-seq               |
| <input checked="" type="checkbox"/> | <input type="checkbox"/> Flow cytometry         |
| <input checked="" type="checkbox"/> | <input type="checkbox"/> MRI-based neuroimaging |

## Unique biological materials

Policy information about [availability of materials](#)

Obtaining unique materials

## Antibodies

### Antibodies used

Rabbit monoclonal anti-RCAS1, Cell Signaling, 12290, Lot 3, 1:100  
 Rabbit polyclonal anti-PDI, Cell Signaling, 3501, Lot 3, 1:100  
 Goat anti-Rabbit Alexa Fluor 647, ThermoFisher, A-21244, 1:1000  
 DyLight 649-conjugated goat anti-rabbit, Jackson ImmunoResearch, 111 995-003, 1:1000  
 Mouse monoclonal anti-ABHD5, Abnova, H00051099-M01, Lot H5091-1F3, 1:1000  
 Goat polyclonal anti-PNPLA3, Everest, EB08402, Lot G2R1, 1:10000  
 Rabbit polyclonal anti-PNPLA3, Abcam, ab81874, Lot GR3209727-2, 1:1000  
 Rabbit polyclonal anti-Gaussia luciferase, Nanolight, 401P, Lot 1107, 1:5000  
 Rabbit polyclonal anti- alpha/beta tubulin, Cell Signaling, 2148S, Lot 7, 1:1000  
 Mouse anti-Goat IgG HRP linked Light Chain Specific, Jackson ImmunoResearch, 205-032-176, Lot 120312, 1:10000  
 Donkey anti-Mouse IgG HRP linked, Jackson ImmunoResearch, 715-035-150, 1:10000  
 Goat anti Rabbit IgG HRP linked, Cell Signaling, 7470, Lot 26, 1:10000  
 Rabbit IgG, Vector, I-1000, Lot X0720

Rabbit polyclonal anti-ABHD5, Proteintech custom antibody made against full length mouse ABHD5

#### Validation

Antibody validation for Western blot analyses involved confirmation that the band corresponded to the reported molecular mass following gel migration. Antibodies against ABHD5 were initially verified using a cell line with shRNA knockdown against ABHD5. Antibodies against PNPLA3 were verified using brown adipose tissue lysate as a positive control and cell lines that lacked known expression of PNPLA3.

## Eukaryotic cell lines

Policy information about [cell lines](#)

|                                                                      |                                                                                                                                                                                                                                  |
|----------------------------------------------------------------------|----------------------------------------------------------------------------------------------------------------------------------------------------------------------------------------------------------------------------------|
| Cell line source(s)                                                  | COS7, 293A and AML12 cells were from ATCC. Immortalized brown adipocytes were a gift from Bruce Spiegelman (Harvard).                                                                                                            |
| Authentication                                                       | Cell lines were derived from authenticated stock from ATCC. No additional verification was performed.                                                                                                                            |
| Mycoplasma contamination                                             | Cell lines were previously determined to be free from Mycoplasma contamination. Generation of novel stable cell lines were cultured in antibiotics against Mycoplasma (10 ug/ml Ciprofloxacin) prior to establishing in the lab. |
| Commonly misidentified lines<br>(See <a href="#">ICLAC</a> register) | No commonly misidentified cells were used.                                                                                                                                                                                       |

## Animals and other organisms

Policy information about [studies involving animals](#); [ARRIVE guidelines](#) recommended for reporting animal research

|                         |                                                    |
|-------------------------|----------------------------------------------------|
| Laboratory animals      | Males C57BL/6J mice 8-12 weeks of age were used.   |
| Wild animals            | The study did not involve the use of wild animals. |
| Field-collected samples | The study did not involve field-collects samples.  |
